# Supplementary material for: Changes in Phylogenetic and Functional Diversity of Ciliates along the Course of a Mediterranean Karstic River
Source: MDPI journal article supplement (doi:10.3390/microorganisms10122493), 2022-12-16
Supplement: s1 [file s1]

**Supplementary Table S2.** Results of Tukey's HSD parametric test applied to test location and side effect (for each location pair and side pair) for phylogenetic alpha diversity indices (PD and PSV) and functional richness metric (FRic), separately.

| <b>Metric</b> | <b>Side</b> | <b>Location pairs</b>      | <b>diff</b> | <b>lwr</b> | <b>upr</b> | <b>pval</b> |
|---------------|-------------|----------------------------|-------------|------------|------------|-------------|
| <b>PD</b>     | light       | Marasovine-Krka spring     | 3.370       | -19.201    | 25.941     | 0.970       |
| <b>PD</b>     | light       | Roski slap-Krka spring     | 21.200      | 1.873      | 40.531     | 0.029       |
| <b>PD</b>     | light       | Skradinski buk-Krka spring | 39.500      | 21.142     | 58.004     | 0.000       |
| <b>PD</b>     | light       | Roski slap-Marasovine      | 17.800      | -5.480     | 41.143     | 0.168       |
| <b>PD</b>     | light       | Skradinski buk-Marasovine  | 36.200      | 13.630     | 58.772     | 0.002       |
| <b>PD</b>     | light       | Skradinski buk-Roski slap  | 18.300      | -0.959     | 37.698     | 0.066       |
| <b>PD</b>     | dark        | Marasovine-Krka spring     | 7.460       | -20.370    | 35.292     | 0.866       |
| <b>PD</b>     | dark        | Roski slap-Krka spring     | 29.600      | 9.036      | 50.315     | 0.004       |
| <b>PD</b>     | dark        | Skradinski buk-Krka spring | 44.700      | 25.070     | 64.429     | 0.000       |
| <b>PD</b>     | dark        | Roski slap-Marasovine      | 22.200      | -6.303     | 50.732     | 0.155       |
| <b>PD</b>     | dark        | Skradinski buk-Marasovine  | 37.200      | 9.458      | 65.119     | 0.008       |
| <b>PD</b>     | dark        | Skradinski buk-Roski slap  | 15.070      | -5.565     | 35.714     | 0.196       |
| <b>PSV</b>    | light       | Roski slap-Skradinski buk  | 0.025       | 0.011      | 0.040      | 0.001       |
| <b>PSV</b>    | light       | Krka spring-Skradinski buk | 0.037       | 0.023      | 0.051      | 0.000       |
| <b>PSV</b>    | light       | Marasovine-Skradinski buk  | 0.037       | 0.021      | 0.054      | 0.000       |
| <b>PSV</b>    | light       | Krka spring-Roski slap     | 0.011       | -0.003     | 0.026      | 0.149       |

|             |       |                            |        |         |        |       |
|-------------|-------|----------------------------|--------|---------|--------|-------|
| <b>PSV</b>  | light | Marasovine-Roski slap      | 0.012  | -0.005  | 0.030  | 0.233 |
| <b>PSV</b>  | light | Marasovine-Krka spring     | 0.001  | -0.016  | 0.018  | 0.990 |
| <b>PSV</b>  | dark  | Roski slap-Skradinski buk  | 0.015  | -0.009  | 0.039  | 0.294 |
| <b>PSV</b>  | dark  | Marasovine-Skradinski buk  | 0.025  | -0.007  | 0.058  | 0.151 |
| <b>PSV</b>  | dark  | Krka spring-Skradinski buk | 0.047  | 0.024   | 0.069  | 0.000 |
| <b>PSV</b>  | dark  | Marasovine-Roski slap      | 0.010  | -0.023  | 0.043  | 0.816 |
| <b>PSV</b>  | dark  | Krka spring-Roski slap     | 0.031  | 0.008   | 0.055  | 0.009 |
| <b>PSV</b>  | dark  | Krka spring-Marasovine     | 0.021  | -0.011  | 0.054  | 0.263 |
| <b>Fric</b> | light | Marasovine-Krka spring     | 2.833  | -18.149 | 23.815 | 0.979 |
| <b>Fric</b> | light | Roski slap-Krka spring     | 31.633 | 13.665  | 49.601 | 0.001 |
| <b>Fric</b> | light | Skradinski buk-Krka spring | 45.333 | 28.201  | 62.465 | 0.000 |
| <b>Fric</b> | light | Roski slap-Marasovine      | 28.800 | 7.130   | 50.470 | 0.008 |
| <b>Fric</b> | light | Skradinski buk-Marasovine  | 42.500 | 21.517  | 63.482 | 0.000 |
| <b>Fric</b> | light | Skradinski buk-Roski slap  | 13.700 | -4.268  | 31.668 | 0.171 |
| <b>Fric</b> | dark  | Marasovine-Krka spring     | 15.000 | -16.679 | 46.667 | 0.538 |
| <b>Fric</b> | dark  | Roski slap-Krka spring     | 41.200 | 17.706  | 64.699 | 0.001 |
| <b>Fric</b> | dark  | Skradinski buk-Krka spring | 51.500 | 29.099  | 73.901 | 0.000 |
| <b>Fric</b> | dark  | Roski slap-Marasovine      | 26.200 | -6.261  | 58.662 | 0.136 |
| <b>Fric</b> | dark  | Skradinski buk-Marasovine  | 35.500 | 4.820   | 68.179 | 0.022 |

|             |      |                                 |        |         |        |       |
|-------------|------|---------------------------------|--------|---------|--------|-------|
| <b>Fric</b> | dark | Skradinski<br>buk-Roski<br>slap | 10.300 | -13.193 | 33.794 | 0.598 |
|-------------|------|---------------------------------|--------|---------|--------|-------|
