# Supplementary material for: Changes in Phylogenetic and Functional Diversity of Ciliates along the Course of a Mediterranean Karstic River
Source: MDPI journal article supplement (doi:10.3390/microorganisms10122493), 2022-12-16
Supplement: s1 [file s1]

**Supplementary Table S1.** Functional traits of ciliates sampled at four locations (Krka spring, Marasovine, Roški slap, Skradinski buk) along the course of the Krka river, Croatia.

| Genus                 | Food                                         | Feeding strategy | Habitat preference            | Motility | Mode of locomotion | Life form |
|-----------------------|----------------------------------------------|------------------|-------------------------------|----------|--------------------|-----------|
| <i>Acineta</i>        | omnivorous                                   | predation        | lentic and lotic (freshwater) | sessile  | unknown            | solitary  |
| <i>Aegyriana</i>      | diatoms                                      | predation        | marine                        | motile   | gliding            | solitary  |
| <i>Amphisiella</i>    | omnivorous                                   | predation        | soil                          | motile   | gliding            | solitary  |
| <i>Agolohymena</i>    | histophagous                                 | predation        | lentic and lotic (freshwater) | motile   | free-swimming      | solitary  |
| <i>Ancistrum</i>      | bacteria                                     | unknown          | symbiotic                     | motile   | jumping, rotating  | solitary  |
| <i>Anigsteinia</i>    | bacteria                                     | filtration       | marine                        | motile   | gliding            | solitary  |
| <i>Anteholosticha</i> | omnivorous                                   | filtration       | marine                        | motile   | crawling/creeping  | solitary  |
| <i>Apobryophyllum</i> | phagotrophic<br>protists, small<br>metazoans | predation        | soil                          | motile   | gliding            | solitary  |
| <i>Apodileptus</i>    | omnivorous                                   | predation        | soil                          | motile   | gliding            | solitary  |
| <i>Apogastrostyla</i> | diatoms                                      | filtration       | marine                        | motile   | crawling/creeping  | solitary  |
| <i>Aristerostoma</i>  | bacteria                                     | unknown          | marine                        | motile   | jumping, rotating  | solitary  |
| <i>Askenasia</i>      | algae,<br>diatoms                            | filtration       | lentic and lotic (freshwater) | motile   | jumping, rotating  | solitary  |

|                         |                    |                                         |                               |              |                   |          |
|-------------------------|--------------------|-----------------------------------------|-------------------------------|--------------|-------------------|----------|
| <i>Aspidisca</i>        | bacteria           | filtration                              | active sludge                 | motile       | crawling/creeping | solitary |
| <i>Blepharisma</i>      | algae,<br>bacteria | filtration                              | lentic and lotic (freshwater) | motile       | free-swimming     | solitary |
| <i>Bresslaua</i>        | omnivorous         | predation                               | soil                          | motile       | free-swimming     | solitary |
| <i>Bryometopus</i>      | bacteria           | filtration,<br>facultative<br>predation | soil                          | motile       | free-swimming     | solitary |
| <i>Carchesium</i>       | bacteria           | filtration                              | lentic and lotic (freshwater) | semi-sessile | unknown           | colonial |
| <i>Cardiostomatella</i> | bacteria           | filtration                              | marine                        | motile       | free-swimming     | solitary |
| <i>Chaenea</i>          | bacteria           | filtration                              | active sludge                 | motile       | crawling/creeping | solitary |
| <i>Chilodonella</i>     | bacteria           | filtration                              | active sludge                 | motile       | gliding           | solitary |
| <i>Chlamydodon</i>      | omnivorous         | unknown                                 | marine                        | motile       | gliding           | solitary |
| <i>Chlamydonella</i>    | omnivorous         | predation                               | soil                          | motile       | gliding           | solitary |
| <i>Clevelandella</i>    | omnivorous         | unknown                                 | symbiotic                     | motile       | free-swimming     | solitary |
| <i>Climacostomum</i>    | omnivorous         | filtration,<br>facultative<br>predation | lentic and lotic (freshwater) | motile       | crawling/creeping | solitary |
| <i>Cohnilembus</i>      | omnivorous         | unknown                                 | symbiotic                     | motile       | free-swimming     | solitary |
| <i>Coleps</i>           | omnivorous         | predation                               | lentic and lotic (freshwater) | motile       | free-swimming     | solitary |

|                       |                                              |            |                               |         |                   |          |
|-----------------------|----------------------------------------------|------------|-------------------------------|---------|-------------------|----------|
| <i>Colpidium</i>      | omnivorous                                   | predation  | lentic and lotic (freshwater) | motile  | free-swimming     | solitary |
| <i>Colpoda</i>        | omnivorous                                   | predation  | soil                          | motile  | gliding           | solitary |
| <i>Colpodidium</i>    | bacteria                                     | filtration | soil                          | motile  | jumping, rotating | solitary |
| <i>Conchophthirus</i> | omnivorous                                   | unknown    | symbiotic                     | motile  | crawling/creeping | solitary |
| <i>Condylostoma</i>   | omnivorous                                   | filtration | soil                          | motile  | gliding           | solitary |
| <i>Cryptocaryon</i>   | omnivorous                                   | unknown    | symbiotic                     | motile  | crawling/creeping | unknown  |
| <i>Cultellothrix</i>  | phagotrophic<br>protists, small<br>metazoans | predation  | soil                          | motile  | gliding           | solitary |
| <i>Cyclotrichium</i>  | omnivorous                                   | unknown    | lentic and lotic (freshwater) | motile  | free-swimming     | solitary |
| <i>Cyrtohymena</i>    | omnivorous                                   | predation  | soil                          | unknown | unknown           | solitary |
| <i>Dexiotricha</i>    | bacteria                                     | filtration | active sludge                 | motile  | unknown           | solitary |
| <i>Diaxonella</i>     | omnivorous                                   | unknown    | marine                        | motile  | unknown           | solitary |
| <i>Dileptus</i>       | omnivorous                                   | predation  | soil                          | motile  | crawling/creeping | solitary |
| <i>Diophrys</i>       | omnivorous                                   | unknown    | marine                        | motile  | crawling/creeping | solitary |
| <i>Enchelys</i>       | omnivorous                                   | predation  | soil                          | motile  | free-swimming     | solitary |
| <i>Engelmanniella</i> | bacteria                                     | unknown    | soil                          | unknown | free-swimming     | solitary |
| <i>Entorhipidium</i>  | omnivorous                                   | unknown    | symbiotic                     | motile  | crawling/creeping | solitary |

|                       |                                              |                                         |                               |         |                   |          |
|-----------------------|----------------------------------------------|-----------------------------------------|-------------------------------|---------|-------------------|----------|
| <i>Epalxella</i>      | bacteria                                     | filtration                              | anaerobic mud                 | motile  | gliding           | solitary |
| <i>Ephelota</i>       | omnivorous                                   | predation                               | symbiotic                     | sessile | unknown           | solitary |
| <i>Epiphyllum</i>     | phagotrophic<br>protists, small<br>metazoans | predation                               | brackish                      | motile  | gliding           | solitary |
| <i>Etoschophrya</i>   | omnivorous                                   | predation                               | soil                          | motile  | jumping, rotating | solitary |
| <i>Euplotes</i>       | omnivorous                                   | filtration                              | active sludge                 | motile  | crawling/creeping | solitary |
| <i>Euplotidium</i>    | unknown                                      | unknown                                 | marine                        | motile  | unknown           | solitary |
| <i>Exocolpoda</i>     | bacteria                                     | unknown                                 | soil                          | motile  | unknown           | solitary |
| <i>Fabrea</i>         | algae,<br>bacteria                           | filtration                              | marine                        | motile  | free-swimming     | solitary |
| <i>Furgasonia</i>     | algae,<br>cyanobacteria                      | predation                               | soil                          | unknown | unknown           | solitary |
| <i>Gastrostyla</i>    | omnivorous                                   | filtration                              | active sludge, soil           | motile  | gliding           | solitary |
| <i>Gonostomum</i>     | omnivorous                                   | filtration,<br>facultative<br>predation | soil                          | motile  | free-swimming     | solitary |
| <i>Gymnodinioides</i> | parasitic                                    | unknown                                 | symbiotic                     | sessile | free-swimming     | solitary |
| <i>Halteria</i>       | omnivorous                                   | filtration                              | lentic and lotic (freshwater) | motile  | jumping, rotating | solitary |

|                         |                                              |                                         |                               |              |                   |          |
|-------------------------|----------------------------------------------|-----------------------------------------|-------------------------------|--------------|-------------------|----------|
| <i>Hartmannula</i>      | omnivorous                                   | unknown                                 | marine                        | motile       | crawling/creeping | solitary |
| <i>Hemicycliostyla</i>  | omnivorous                                   | unknown                                 | lentic and lotic (freshwater) | motile       | unknown           | solitary |
| <i>Hemiophrys</i>       | unknown                                      | predation                               | marine                        | motile       | gliding           | solitary |
| <i>Hemiurosoma</i>      | bacteria                                     | predation                               | soil                          | motile       | gliding           | solitary |
| <i>Heterokeronopsis</i> | unknown                                      | unknown                                 | marine                        | motile       | crawling/creeping | solitary |
| <i>Histiobalantium</i>  | omnivorous                                   | unknown                                 | lentic and lotic (freshwater) | euplanktonic | drifting          | solitary |
| <i>Holosticha</i>       | omnivorous                                   | filtration                              | soil                          | motile       | free-swimming     | solitary |
| <i>Isotricha</i>        | bacteria                                     | filtration                              | symbiotic                     | motile       | free-swimming     | solitary |
| <i>Kahliella</i>        | omnivorous                                   | unknown                                 | soil                          | motile       | gliding           | solitary |
| <i>Kentrophoros</i>     | bacteria                                     | filtration                              | marine                        | motile       | gliding           | unknown  |
| <i>Kuklikophrya</i>     | cyanobacteria                                | unknown                                 | soil                          | motile       | gliding           | solitary |
| <i>Lacrymaria</i>       | phagotrophic<br>protists, small<br>metazoans | predation                               | lentic and lotic (freshwater) | motile       | free-swimming     | solitary |
| <i>Latteuria</i>        | bacteria                                     | unknown                                 | symbiotic                     | unknown      | free-swimming     | unknown  |
| <i>Lembadion</i>        | omnivorous                                   | filtration,<br>facultative<br>predation | lentic and lotic (freshwater) | motile       | free-swimming     | solitary |
| <i>Limnostrombidium</i> | algae                                        | unknown                                 | lentic and lotic (freshwater) | motile       | free-swimming     | solitary |

|                         |                                              |           |                               |         |                   |          |
|-------------------------|----------------------------------------------|-----------|-------------------------------|---------|-------------------|----------|
| <i>Litonotus</i>        | phagotrophic<br>protists, small<br>metazoans | predation | soil                          | motile  | free-swimming     | solitary |
| <i>Loxodes</i>          | omnivorous                                   | predation | lentic and lotic (freshwater) | motile  | free-swimming     | solitary |
| <i>Loxophyllum</i>      | phagotrophic<br>protists, small<br>metazoans | predation | lentic and lotic (freshwater) | motile  | free-swimming     | solitary |
| <i>Maryna</i>           | bacteria                                     | unknown   | lentic and lotic (freshwater) | motile  | free-swimming     | solitary |
| <i>Mesanophrys</i>      | parasitic                                    | unknown   | symbiotic                     | motile  | gliding           | solitary |
| <i>Meseres</i>          | omnivorous                                   | unknown   | soil                          | motile  | jumping, rotating | solitary |
| <i>Mesodinium</i>       | omnivorous                                   | unknown   | lentic and lotic (freshwater) | motile  | jumping, rotating | solitary |
| <i>Metaurostylopsis</i> | algae,<br>diatoms                            | unknown   | marine                        | motile  | crawling/creeping | solitary |
| <i>Miamiensis</i>       | histophagous                                 | unknown   | symbiotic                     | motile  | unknown           | solitary |
| <i>Microxysma</i>       | algae,<br>bacteria                           | unknown   | marine                        | unknown | unknown           | solitary |
| <i>Nassula</i>          | algae,<br>cyanobacteria                      | predation | soil                          | motile  | free-swimming     | solitary |
| <i>Novistrombidium</i>  | algae                                        | unknown   | marine                        | motile  | free-swimming     | solitary |
| <i>Njinella</i>         | astomata                                     | unknown   | symbiotic                     | unknown | unknown           | unknown  |

|                        |                                              |            |                               |         |                   |          |
|------------------------|----------------------------------------------|------------|-------------------------------|---------|-------------------|----------|
| <i>Obertrumia</i>      | algae,<br>cyanobacteria                      | predation  | soil                          | motile  | free-swimming     | solitary |
| <i>Ophryoglena</i>     | histophagous                                 | predation  | lentic and lotic (freshwater) | motile  | free-swimming     | solitary |
| <i>Oxytricha</i>       | omnivorous                                   | filtration | lentic and lotic (freshwater) | motile  | free-swimming     | solitary |
| <i>Paracineta</i>      | omnivorous                                   | predation  | soil                          | sessile | unknown           | solitary |
| <i>Parafurgasonia</i>  | bacteria                                     | predation  | soil                          | motile  | crawling/creeping | solitary |
| <i>Paramecium</i>      | omnivorous                                   | filtration | lentic and lotic (freshwater) | motile  | free-swimming     | solitary |
| <i>Paranassula</i>     | omnivorous                                   | predation  | marine                        | motile  | free-swimming     | unknown  |
| <i>Paraspathidium</i>  | unknown                                      | predation  | marine                        | motile  | crawling/creeping | solitary |
| <i>Paratetrahymena</i> | bacteria                                     | filtration | marine                        | motile  | gliding           | solitary |
| <i>Paraurostyla</i>    | omnivorous                                   | filtration | soil                          | motile  | free-swimming     | solitary |
| <i>Paruroleptus</i>    | omnivorous                                   | unknown    | soil                          | motile  | free-swimming     | solitary |
| <i>Perisincirra</i>    | omnivorous                                   | unknown    | soil                          | motile  | gliding           | solitary |
| <i>Phacodinium</i>     | omnivorous                                   | unknown    | soil                          | motile  | free-swimming     | solitary |
| <i>Phialina</i>        | phagotrophic<br>protists, small<br>metazoans | predation  | active sludge                 | motile  | free-swimming     | solitary |
| <i>Philasterides</i>   | histophagous                                 | unknown    | lentic and lotic (freshwater) | motile  | free-swimming     | solitary |

|                            |                                              |            |                               |              |                   |          |
|----------------------------|----------------------------------------------|------------|-------------------------------|--------------|-------------------|----------|
| <i>Placus</i>              | omnivorous                                   | predation  | lentic and lotic (freshwater) | motile       | free-swimming     | solitary |
| <i>Plagiocampa</i>         | omnivorous                                   | predation  | soil                          | motile       | free-swimming     | solitary |
| <i>Plagiopyliella</i>      | unknown                                      | unknown    | symbiotic                     | unknown      | unknown           | solitary |
| <i>Platyophrya</i>         | omnivorous                                   | unknown    | soil                          | motile       | free-swimming     | solitary |
| <i>Pleuronema</i>          | omnivorous                                   | filtration | lentic and lotic (freshwater) | motile       | jumping, rotating | solitary |
| <i>Polydiniella</i>        | bacteria                                     | filtration | symbiotic                     | unknown      | unknown           | unknown  |
| <i>Porpostoma</i>          | diatoms                                      | filtration | symbiotic                     | motile       | free-swimming     | solitary |
| <i>Prorodon</i>            | omnivorous                                   | predation  | lentic and lotic (freshwater) | motile       | free-swimming     | solitary |
| <i>Protospathidium</i>     | phagotrophic<br>protists, small<br>metazoans | predation  | soil                          | motile       | free-swimming     | solitary |
| <i>Pseudepistylis</i>      | unknown                                      | unknown    | lentic and lotic (freshwater) | semi-sessile | gliding           | colonial |
| <i>Pseudochilodonopsis</i> | algae,<br>diatoms                            | predation  | lentic and lotic (freshwater) | motile       | unknown           | solitary |
| <i>Pseudocyrtolophosis</i> | bacteria                                     | unknown    | soil                          | motile       | crawling/creeping | solitary |
| <i>Pseudokeronopsis</i>    | omnivorous                                   | unknown    | marine                        | motile       | free-swimming     | solitary |
| <i>Pseudomicrothorax</i>   | algae,<br>cyanobacteria                      | predation  | soil                          | motile       | free-swimming     | solitary |
| <i>Pseudoplatyophrya</i>   | fungi                                        | predation  | soil                          | motile       | jumping, rotating | solitary |



|                         |                                              |                                         |                               |              |               |          |
|-------------------------|----------------------------------------------|-----------------------------------------|-------------------------------|--------------|---------------|----------|
| <i>Pseudotontonia</i>   | unknown                                      | unknown                                 | marine                        | motile       | drifting      | solitary |
| <i>Pseudouroleptus</i>  | omnivorous                                   | unknown                                 | soil                          | motile       | gliding       | solitary |
| <i>Pseudourostyla</i>   | omnivorous                                   | predation                               | soil                          | motile       | gliding       | solitary |
| <i>Pseudovorticella</i> | algae,<br>bacteria                           | filtration                              | soil                          | semi-sessile | unknown       | colonial |
| <i>Raabena</i>          | unknown                                      | unknown                                 | symbiotic                     | unknown      | unknown       | unknown  |
| <i>Remanella</i>        | unknown                                      | unknown                                 | marine                        | motile       | gliding       | solitary |
| <i>Sandmanniella</i>    | omnivorous                                   | unknown                                 | soil                          | motile       | free-swimming | solitary |
| <i>Schizocaryum</i>     | omnivorous                                   | unknown                                 | symbiotic                     | motile       | free-swimming | unknown  |
| <i>Spathidiopsis</i>    | phagotrophic<br>protists, small<br>metazoans | predation                               | symbiotic                     | motile       | free-swimming | solitary |
| <i>Spirostomum</i>      | algae,<br>bacteria                           | filtration                              | lentic and lotic (freshwater) | motile       | free-swimming | solitary |
| <i>Stentor</i>          | omnivorous                                   | filtration,<br>facultative<br>predation | lentic and lotic (freshwater) | motile       | free-swimming | solitary |
| <i>Sterkiella</i>       | omnivorous                                   | predation                               | active sludge, soil           | motile       | free-swimming | solitary |
| <i>Stokesia</i>         | omnivorous                                   | predation                               | lentic and lotic (freshwater) | euplanktonic | drifting      | solitary |

|                        |                    |            |                               |              |                   |          |
|------------------------|--------------------|------------|-------------------------------|--------------|-------------------|----------|
| <i>Strombidinopsis</i> | omnivorous         | unknown    | marine                        | euplanktonic | drifting          | solitary |
| <i>Strombidium</i>     | omnivorous         | filtration | lentic and lotic (freshwater) | motile       | jumping, rotating | solitary |
| <i>Strongylidium</i>   | omnivorous         | unknown    | soil                          | motile       | crawling/creeping | unknown  |
| <i>Stylonychia</i>     | omnivorous         | filtration | lentic and lotic (freshwater) | motile       | free-swimming     | solitary |
| <i>Tetrahymena</i>     | bacteria           | filtration | active sludge                 | motile       | free-swimming     | solitary |
| <i>Tiarina</i>         | algae              | predation  | marine                        | motile       | free-swimming     | solitary |
| <i>Tintinnidium</i>    | omnivorous         | filtration | lentic and lotic (freshwater) | euplanktonic | drifting          | solitary |
| <i>Tokophrya</i>       | omnivorous         | predation  | soil                          | sessile      | unknown           | solitary |
| <i>Trachelius</i>      | omnivorous         | predation  | lentic and lotic (freshwater) | motile       | unknown           | solitary |
| <i>Trachelocerca</i>   | omnivorous         | unknown    | marine                        | motile       | gliding           | solitary |
| <i>Trichodina</i>      | omnivorous         | filtration | symbiotic                     | motile       | jumping, rotating | unknown  |
| <i>Trichodinella</i>   | omnivorous         | unknown    | symbiotic                     | motile       | unknown           | unknown  |
| <i>Trichopodiella</i>  | algae,<br>bacteria | unknown    | symbiotic                     | motile       | free-swimming     | solitary |
| <i>Triplumaria</i>     | unknown            | unknown    | symbiotic                     | unknown      | unknown           | unknown  |
| <i>Trithigmostoma</i>  | algae,<br>diatoms  | predation  | active sludge, soil           | motile       | crawling/creeping | solitary |
| <i>Trochilia</i>       | omnivorous         | predation  | active sludge                 | motile       | crawling/creeping | solitary |

|                       |                                              |            |                               |              |                   |          |
|-----------------------|----------------------------------------------|------------|-------------------------------|--------------|-------------------|----------|
| <i>Trochochilodon</i> | unknown                                      | unknown    | marine                        | motile       | gliding           | solitary |
| <i>Tunicothrix</i>    | omnivorous                                   | unknown    | marine                        | motile       | free-swimming     | solitary |
| <i>Urceolaria</i>     | omnivorous                                   | filtration | symbiotic                     | motile       | free-swimming     | solitary |
| <i>Urocentrum</i>     | omnivorous                                   | filtration | lentic and lotic (freshwater) | motile       | jumping, rotating | solitary |
| <i>Uroleptus</i>      | omnivorous                                   | filtration | lentic and lotic (freshwater) | motile       | free-swimming     | solitary |
| <i>Uronema</i>        | omnivorous                                   | filtration | lentic and lotic (freshwater) | motile       | jumping, rotating | solitary |
| <i>Uronemella</i>     | bacteria                                     | unknown    | marine                        | motile       | jumping, rotating | unknown  |
| <i>Urostyla</i>       | omnivorous                                   | predation  | lentic and lotic (freshwater) | motile       | free-swimming     | solitary |
| <i>Vampyrophrya</i>   | histophagous                                 | unknown    | lentic and lotic (freshwater) | motile       | free-swimming     | unknown  |
| <i>Vorticella</i>     | omnivorous                                   | filtration | active sludge                 | semi-sessile | unknown           | solitary |
| <i>Vorticellides</i>  | bacteria                                     | filtration | lentic and lotic (freshwater) | semi-sessile | unknown           | colonial |
| <i>Woodruffides</i>   | phagotrophic<br>protists, small<br>metazoans | predation  | soil                          | motile       | gliding           | solitary |
| <i>Zosterodasys</i>   | algae,<br>diatoms                            | predation  | lentic and lotic (freshwater) | motile       | crawling/creeping | solitary |
