# Supplementary material for: Changes in Phylogenetic and Functional Diversity of Ciliates along the Course of a Mediterranean Karstic River
Source: MDPI journal article supplement (doi:10.3390/microorganisms10122493), 2022-12-16
Supplement: s1 [file s1]

**Supplementary Table 3.** Environmental parameters at the four investigated locations (Krka spring, Marasovine, Roški slap, Skradinski buk) along the course of the Krka River, Croatia. Sampling locations Krka spring (I and II), Roški slap (I and II) and Skradinski buk (I and II) were sampled on two representative habitats.

|                                                       | Krka<br>spring<br>I | Krka<br>spring II | Marasovine | Roški slap<br>I | Roški slap<br>II | Skradinski<br>buk I | Skradinski<br>buk II |
|-------------------------------------------------------|---------------------|-------------------|------------|-----------------|------------------|---------------------|----------------------|
| T (°C)                                                | 10.3                | 10.4              | -          | 15.4            | 15.4             | 20.6                | 20.2                 |
| DO (mg L <sup>-1</sup> )                              | 10.26               | 10.4              | -          | 9.75            | 9.5              | 9.16                | 8.19                 |
| O <sub>2</sub> (%)                                    | 94.5                | 95.4              | -          | 97.2            | 95.2             | 101.5               | 98.1                 |
| pH                                                    | 7.75                | 7.76              | 7.88       | 8.35            | 7.96             | 8.58                | 8.53                 |
| EC (μS cm <sup>-1</sup> )                             | 391                 | 405               | 690        | 648             | 653              | 505                 | 523                  |
| N-NO <sub>3</sub> <sup>-</sup> (mg L <sup>-1</sup> )  | <0.1                | <0.1              | <0.1       | 6.6             | <0.1             | 6.2                 | 1.8                  |
| N-NO <sub>2</sub> <sup>-</sup> (mg L <sup>-1</sup> )  | <0.001              | <0.001            | <0.001     | <0.001          | <0.001           | <0.001              | <0.001               |
| N-NH <sub>4</sub> <sup>+</sup> (mg L <sup>-1</sup> )  | <0.01               | <0.01             | <0.01      | 0.02            | <0.01            | <0.01               | <0.01                |
| P-PO <sub>4</sub> <sup>3-</sup> (mg L <sup>-1</sup> ) | 0.31                | 0.31              | <0.01      | 0.27            | <0.01            | <0.01               | <0.01                |
| SiO <sub>2</sub> (mg L <sup>-1</sup> )                | 0.9                 | 0.8               | 1.7        | 2               | 2.4              | 0.8                 | 1.2                  |
| TN (mg L <sup>-1</sup> )                              | <0.1                | <0.1              | <0.1       | 7.1             | <0.1             | 6.4                 | 2                    |
| TIC (mg L <sup>-1</sup> )                             | 10.77               | 10.78             | 10.46      | 10.79           | 11.06            | 10.55               | 9.78                 |
| DIC (mg L <sup>-1</sup> )                             | 10.53               | 10.64             | 10.2       | 10.45           | 10.73            | 10.15               | 8.88                 |
| TOC (mg L <sup>-1</sup> )                             | 0.61                | 1.44              | 0.96       | 0.61            | 0.72             | 1.37                | 2.17                 |
| DOC (mg L <sup>-1</sup> )                             | 0.26                | 0.23              | 0.46       | 0.45            | 0.44             | 1.09                | 1.1                  |
