# Supplementary material for: Changes in Phylogenetic and Functional Diversity of Ciliates along the Course of a Mediterranean Karstic River
Source: MDPI journal article supplement (doi:10.3390/microorganisms10122493), 2022-12-16
Supplement: s1 [file s1]

**Supplementary Table 4.** Results of Non-metric multidimensional distance scaling (NMDS) analysis of the Unifrac distance indices of the ciliate community at OTU level with environmental parameters (DIC = dissolved inorganic carbon, DOC = dissolved organic carbon, EC = conductivity, N-NO<sub>3</sub><sup>-</sup> = nitrates, O<sub>2</sub> = oxygen saturation, pH, P-PO<sub>4</sub><sup>3-</sup> = phosphates, T = temperature, TN = total nitrogen). Statistically significant results (p<0.05) are reported in bold.

|                                 | NMDS1  | NMDS2  | R <sup>2</sup> | <i>p</i>     |
|---------------------------------|--------|--------|----------------|--------------|
| pH                              | 0.280  | -0.960 | 0.363          | <b>0.002</b> |
| EC                              | 0.674  | 0.738  | 0.120          | 0.098        |
| O <sub>2</sub>                  | 0.135  | -0.991 | 0.204          | <b>0.013</b> |
| T                               | 0.224  | -0.975 | 0.408          | <b>0.001</b> |
| N-NO <sub>3</sub> <sup>-</sup>  | 0.125  | -0.992 | 0.320          | <b>0.003</b> |
| P-PO <sub>4</sub> <sup>3-</sup> | -0.590 | 0.808  | 0.098          | 0.146        |
| TN                              | 0.135  | -0.991 | 0.317          | <b>0.003</b> |
| DOC                             | 0.263  | -0.965 | 0.249          | <b>0.006</b> |
| DIC                             | -0.999 | -0.033 | 0.140          | 0.062        |
